# Supplementary material for: PIK3CA mutation in endometriotic epithelial cells promotes viperin-dependent inflammatory response to insulin
Source: PubMed Central journal article supplement (PMC10173629; doi:10.1186/s12958-023-01094-6), 2023-05-11
Supplement: 12958_2023_1094_MOESM1_ESM.pdf [file 12958_2023_1094_MOESM1_ESM.pdf]

PIK3CA mutation in endometriotic epithelial cells promotes viperin-dependent inflammatory response to insulin

Wilson et al. 2023

Supplemental Figure

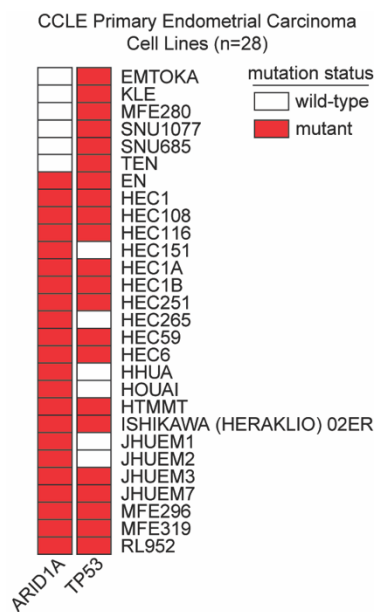

**Supplemental Figure 1. ARID1A and TP53 mutation profiles of endometrial cancer cell lines.**

Mutation data was collected from the Cancer Cell Line Encyclopedia (CCLE) for 28 primary endometrial cancer cell lines. Red indicates a mutation was observed for ARID1A (left column) or TP53 (right column). Cell lines were clustered based on ARID1A mutation status.

Figure 1A

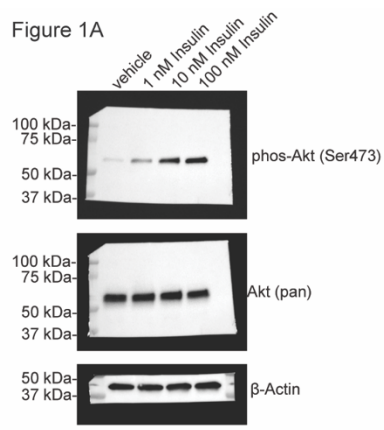

Figure 2A

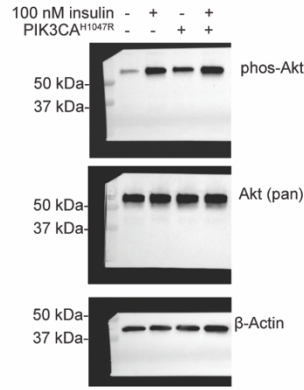

Figure 3B

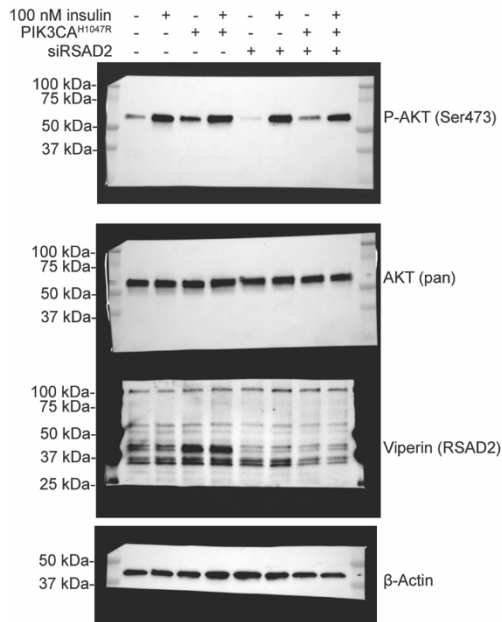

Figure 5A

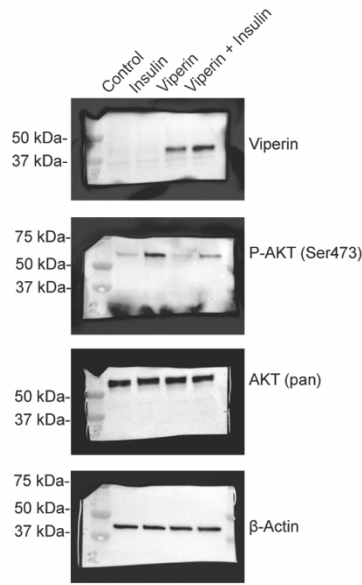

Supplemental Figure 2. Uncropped western blots.
